# Supplementary material
Source: PubMed Central journal article supplement (PMC3752219)
Supplement: 1304048110_pnas.201304048SI.pdf [file 1304048110_pnas.201304048SI.pdf]

# Supporting Information

Gopalakrishnan et al. 10.1073/pnas.1304048110

## SI Materials and Methods

CD4-FITC (561835), CD8-FITC (553031), CD4-biotin (553044), CD8a-biotin (553028), CD44-PE (553134), and CD25-APC (557192) antibodies were purchased from BD Biosciences and used for cell

staining and sorting. H3K4me2 (07-030, Millipore), H3K27ac (ab4729), and P300 (C-20) (SC-585x) for H3ac (06-599; Millipore), H3K4me3 (39159; Active Motif), and CTCF (07-729; Millipore) antibodies were purchased and used for ChIP experiments.

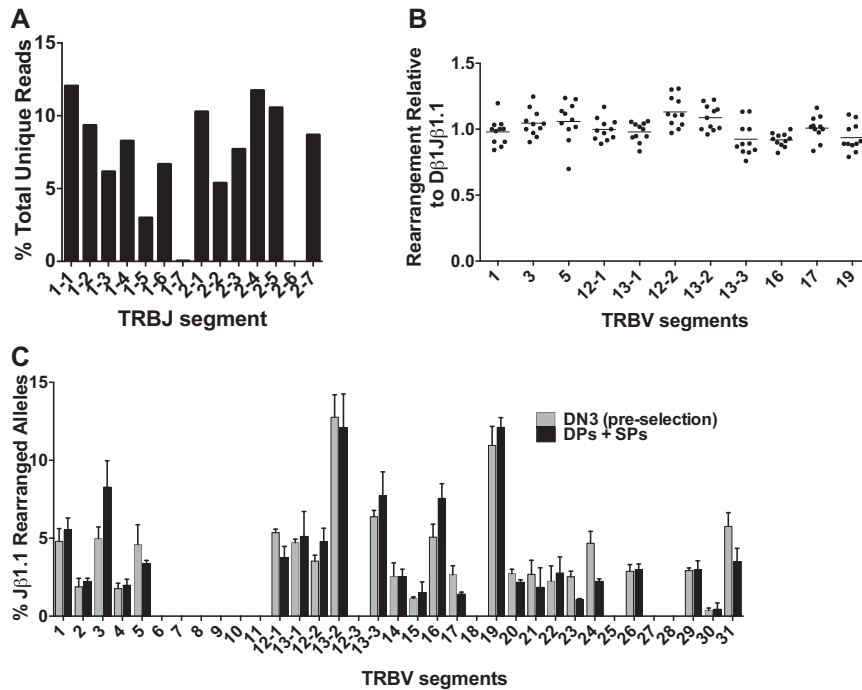

**Fig. S1.** Variable (V) $\beta$  repertoire comparisons. (A) Joining (J) $\beta$  use profile from high-throughput sequencing [mean ( $n = 3$ ), 15,000–20,000 unique reads per sample]. (B) Distribution of rearrangements from high-throughput sequencing involving V $\beta$  segments and each of the 11 functional J $\beta$  segments. Shown are distributions for rearrangements of V $\beta$  segments yielding at least 1,000 unique reads. Data are represented relative to the distribution of V $\beta$ -J $\beta$ 1.1, where percent total V $\beta$ -J $\beta$ 1.1 is set to a value of 1 (Fig. 1). Each circle represents a data point for a given J $\beta$  segment. (C) Comparison of V $\beta$  use in preselection and postselection thymocytes measured by the genomic DNA (gdNA) assay described in Fig. 1C (mean  $\pm$  SEM,  $n = 3$ ).





**Table S2. Primers and probes for V $\beta$  utilization assay**

Taqman probes (5'FAM and 3' TAMRA from Sigma Life Sciences)

J $\beta$  1.1 probe

J $\beta$  2.1 Probe

Primers for cloning V $\beta$ J $\beta$  template plasmids

J $\beta$  1.1 F

J $\beta$  1.1 R

J $\beta$  2.1 F

J $\beta$  2.1 R

V1-F

V1-R

V2-F

V2-R

V3-F

V3-R

V4-F

V4-R

V5-F

V5-R

V6-F

V6-R

V7-F

V7-R

V8-F

V8-R

V9-F

V9-R

V10-F

V10-R

V11-F

V11-R

V12-1-F

V12-1-R

V13-1-F

V13-1-R

V12-2-F

V12-2-R

V13-2-F

V13-2-R

V12-3-F

V12-3-R

V13-3-F

V13-3-R

V14-F

V14-R

V15-F

V15-R

V16-F

V16-R

V17-F

V17-R

V18-F

V18-R

V19-F

V19-R

V20-F

V20-R

V21-F

V21-R

V22-F

V22-R

V23-F

V23-R

Sequences

5'FAM-TGTGAGTCTGGTTCCTTACCAA-3'TAMRA

5'HEX-TAGGACGGTGAGTCGTGTCC-3'TAMRA

Sequences

5'-GACAGACGGATCCTGGCACTGTGCAAACACAGAAGTC-3'

5'-TACATCGCGGCCGCACTCGAATATGGACACGGAGGACA-3'

5'-GACAGACGGATCCGTAACATATGCTGAGCAGTTCTTCGGACC-3'

5'-TACATCGCGGCCGAGTCCTGGAAATGCTGGCACAACAAC-3'

5'-TATCTCGAGCTGGAGCAAAACCCAAGGTG-3'

5'-CGAGAAGCTTTGCAGTACAAGTTCTGCCCT-3'

5'-TATCTCGAGCGAAAATTATCCAGAAACCAA-3'

5'-CGAGAAGCTTGACAGAAAGTATGTGGCCGAG-3'

5'-TATCTCGAGCAGATGGTGACCCCTCAATTGT-3'

5'-TAGCGAAGCTTTAAGCTGCTGGCACAGAAG-3'

5'-TATCTCGAGGACGGCTGTTTTCCAGACT-3'

5'-CGAGAAGCTTTGGCACAGAGATACACAGCAG-3'

5'-TATCTCGAGGATATCTAATCTGGGAAGAGC-3'

5'-CGAGAAGCTTCTGCCGTGGATCCAGAAGACT-3'

5'-TATCTCGAGGTTACAGACATGGGACAGAAATGTCA-3'

5'-CGAGAAGCTTAGCTGCTGGCATAACATAGTGGAGT-3'

5'-TATCTCGAGAGCAGGCTCTGCTTCTGACTTGT-3'

5'-CGAGAAGCTTAGAACAGTGCAGAGTCTTTGGCT-3'

5'-TAGCCTCGAGCATTGACTCCCAAATCAT-3'

5'-TAGCGAAGCTTCTGTGCATGATCTGGAGAC-3'

5'-TATCTCGAGGTGACACAATTTCTGGTCTACTGG-3'

5'-CGAGAAGCTTCTTCTGGCACAGAGATAGATGCCT-3'

5'-TATCTCGAGGTTGGAATCACCCAGACACCTAGATA-3'

5'-CGAGAAGCTTAGTACATGGAGTCTGGTTGGAACG-3'

5'-TATCTCGAGAGGCACTTCTGATATGTGGCCTCT-3'

5'-CGAGAAGCTTAGTTAGAAAACCATGGCTTTGCC-3'

5'-TATCTCGAGCTGACGTGATTTCCCATCTCT-3'

5'-TAGCGAAGCTTCCAGTCCAAAGGCACTCATG-3'

5'-TATCTCGAGTGGTTAGCCCAAGTGTGCTTCTCT-3'

5'-CGAGAAGCTTAAGCCAATTCCAGCAGGAGGAAGA-3'

5'-TATCTCGAGCATTGCTGCTGCTGCTGCTGC-3'

5'-TAGCGAAGCTTACACGGCAGAGTCTCTAG-3'

5'-TATCTCGAGTCTGTGTTCAAGTGAAGTGGT-3'

5'-CGAGAAGCTTTGGTCTGGAGGCCCTTGATCCAT-3'

5'-TAGCCTCGAGCCTTCTCCCAAGGTCAGC-3'

5'-TAGCGAAGCTTACACAGTAAAGTCTCTAGGTCC-3'

5'-TATCTCGAGGACGATATGATCAGGCTTTG-3'

5'-TAGCGAAGCTTAGAAAATACAGTGTCTGAG-3'

5'-TATCTCGAGTATGCAGTCTACAGGAAGGGCAA-3'

5'-CGAGAAGCTTAAACTGCTGGCACAGAGATAGGTG-3'

5'-TATCTCGAGCAGACCCAGACATGAGGT-3'

5'-CGAGAAGCTTACAGCTGAGTCTTGGGTTCTG-3'

5'-TATCTCGAGCACCTAGGCACAAGGTGACA-3'

5'-TAGCGAAGCTTACAGACTCAGCGGTGATCT-3'

5'-TATCTCGAGGATACTACGGTTAAGCAGAAC-3'

5'-TAGCGAAGCTTAGCACAGAGGTACATGGCAG-3'

5'-TAGCCTCGAGGCTGGTGTACCACGAACCT-3'

5'-TAGCGAAGCTTCTGTCATCTCCAGATCTGC-3'

5'-TATCTCGAGCTCAGACACCCAAATCCTGA-3'

5'-CGAGAAGCTTGCTATACTGCTGGCACAGAGA-3'

5'-TATCTCGAGCTCTATCAATATCCAGAAG-3'

5'-CGAGAAGCTTAGCACACAGAGATATAAGCC-3'

5'-TAGCCTCGAGGTTGTCCAGAATCCTAGACAT-3'

5'-TAGCGAAGCTTGTACACAGCTGAATCTGTTAG-3'

5'-TATCTCGAGCCAAGTTATCCAGACTCCAT-3'

5'-TAGCGAAGCTTATAACTGAGTCTCCAGCCTC-3'

5'-TATCTCGAGGAAAGGCCAGGAAGCAGAGAT-3'

5'-CGAGAAGCTTGCTGGAGCAAGTACAGTGC-3'



**Table S3. Primers and probes for 3C assay**

| 3C anchor primers and Taqman probes<br>(5' FAM and 3' TAMRA from Sigma Life Sciences) | Sequences                        |
|---------------------------------------------------------------------------------------|----------------------------------|
| D $\beta$ _1 HindIII probe                                                            | 5'-AAGGCATTGTTGCATGATCCT-3'      |
| D $\beta$ _2 HindIII probe                                                            | 5'-AAATGCTGGGCCTCTGTAGA-3'       |
| E $\beta$ _ HindIII probe                                                             | 5'-CATAAGCATTGTGATGTTTGTGACA-3'  |
| ERCC3 HindIII probe                                                                   | 5'-AAAGCTTGACCCCTGCTTTAGTGGCC-3' |
| D $\beta$ _1 HindIII primer                                                           | 5'-TGAAATTTTTCTGCCGAAAGGAC-3'    |
| D $\beta$ _2 HindIII primer                                                           | 5'-GCGGGATCCAAGAGAACTCA-3'       |
| E $\beta$ _ HindIII primer                                                            | 5'-GAAAATTGGCATCGTTTTGC-3'       |
| HindIII primers                                                                       | Sequences                        |
| V1                                                                                    | 5'-TATCTCTGTGGGCATGCAG-3'        |
| V2                                                                                    | 5'-TTTCATTCACAGCCGACCAG-3'       |
| V3                                                                                    | 5'-TTTCATTCACAGCCGACCAG-3'       |
| V4                                                                                    | 5'-AGCTCGACACAGAAAGCAAGTT-3'     |
| V5                                                                                    | 5'-AGCTCGACACAGAAAGCAAGTT-3'     |
| V6                                                                                    | 5'-GGTCCCTTCACTTCCCACA-3'        |
| V7                                                                                    | 5'-GTCCGCTAGCAGCCAGAGTT-3'       |
| V8                                                                                    | 5'-GTCCGCTAGCAGCCAGAGTT-3'       |
| V9                                                                                    | 5'-ACCAGAGGGCAGCTGAAAAT-3'       |
| V10                                                                                   | 5'-GTGCCTGTACCATGCTGTGG-3'       |
| V11                                                                                   | 5'-TTCAGCAAGTAGGTGCGAAGA-3'      |
| V12-1                                                                                 | 5'-TGGTGGGATCCTGACAGCTTATA-3'    |
| V13-1                                                                                 | 5'-CCATCTGCATGAACACCTTCTT-3'     |
| V12-2                                                                                 | 5'-CCATCTGCATGAACACCTTCTT-3'     |
| V13-2                                                                                 | 5'-CCATCTGCATGAACACCTTCTT-3'     |
| V12-3                                                                                 | 5'-GGATCTTGGTCTCGGGAGGT-3'       |
| V13-3                                                                                 | 5'-CTCAGCTGCACCCTCACAAAC-3'      |
| V14                                                                                   | 5'-CAGGCTTTTGAGTGCCATGT-3'       |
| V15                                                                                   | 5'-AGGCAGGAGGTGAGTCTTGG-3'       |
| V16                                                                                   | 5'-TATCATGCCCAGCTGCATTC-3'       |
| V17                                                                                   | 5'-GTTAGGCCGACTGGATTGGA-3'       |
| V18                                                                                   | 5'-GGCAGTGTTACAGAACCCAGTG-3'     |
| V19                                                                                   | 5'-GGCAGTGTTACAGAACCCAGTG-3'     |
| V20                                                                                   | 5'-TGTGATGGGTTGTCATCTGGA-3'      |
| V22                                                                                   | 5'-CCAAGGGATGATGTCACAGG-3'       |
| V23                                                                                   | 5'-TACACCGGCCAGGAGAGACT-3'       |
| V24                                                                                   | 5'-ACTAGGCCAGCAGAGGATGC-3'       |
| V25                                                                                   | 5'-ACTAGGCCAGCAGAGGATGC-3'       |
| V26                                                                                   | 5'-AGCATAGGATTGGGCCTCAG-3'       |
| V27                                                                                   | 5'-CATCACTGCGCCTAGCAATC-3'       |
| V28                                                                                   | 5'-GCGTGTGCCACGTTTTTGTA-3'       |
| V29                                                                                   | 5'-CTCTAGCAATCCCCCTGTGC-3'       |
| V31                                                                                   | 5'-AAGGAGAGAGCAGGCCACAG-3'       |
| D $\beta$ _1                                                                          | 5'-AAGGCATTGTTGCATGATCC-3'       |
| D $\beta$ _2                                                                          | 5'-TGGGGCCCTCACTTTTCTTA-3'       |
| E $\beta$                                                                             | 5'-TCCTAAGGAGAGGCAGAGTGG-3'      |
| ERCC3                                                                                 | 5'-GACTTCTCACCTGGGCCTACA-3'      |

**Table S4. Luciferase assay cloning primers**

| Primer name | Sequences                                 |
|-------------|-------------------------------------------|
| Eβ-F        | 5'-ATTGGATCCGTTAACCAGGCACAGTAGGACC-3'     |
| Eβ-R        | 5'-ATTGGATCCCATGGTGCATACTGAAGGCTTC-3'     |
| Pro-V1F     | 5'-TAGCCTCGAGGAGTACTAGTTACTTCTGC-3'       |
| Pro-V1R     | 5'-TAGCGAAGCTTCTCTGAGACCTCAGTTTCTC-3'     |
| Pro-V3-F    | 5'-TATCTCGAGGGGACTCAGTTCAGTAGTC-3'        |
| Pro-V3-R    | 5'-CGAGAAGCTTAGTAGGGTCACGGCAGGAA-3'       |
| Pro-V4F     | 5'-TAGCCTCGAGTGTGCTAAGGGCACCAATGAAT-3'    |
| Pro-V4R     | 5'-TAGCGAAGCTTGTGGGTCAAGGCAGGGCAAAT-3'    |
| Pro V5-FX   | 5'-TAGCCTCGAGTATCCATTGTATGCTCTGTTTG-3'    |
| Pro V5-RH   | 5'-TAGCGAAGCTTGGTGAATCAGGCTCCAGACG-3'     |
| Pro V6-FX   | 5'-TAGCCTCGAGCTACAAGCTCCAAGAGAGAG-3'      |
| Pro V6-RH   | 5'-TAGCGAAGCTTCTCTGGAGAAGACAGAGGAC-3'     |
| Pro-V7F     | 5'-TAGCCTCGAGGCTGCTGAATAGCAAGTTTCCAG-3'   |
| Pro-V7R     | 5'-TAGCGAAGCTTTGGAGGTTTGGATCTGTAGTCT-3'   |
| Pro V9-FX   | 5'-TAGCCTCGAGGGAACCTTTCATGTGAGGAGA-3'     |
| Pro V9-RH   | 5'-TAGCGAAGCTTCTGCAAAAATAAAGTTGTGAACAG-3' |
| Pro V10-FX  | 5'-TAGCCTCGAGGGGATATCTCTATGCTTTAATG-3'    |
| Pro V10-RH  | 5'-TAGCGAAGCTTCTGGAGAAGGAGGCATAAGGA-3'    |
| Pro-V11F    | 5'-TAGCCTCGAGTTCCTACAGTGTCAAGGGCTG-3'     |
| Pro-V11R    | 5'-TAGCGAAGCTTGTACCCACAGGGTTGTTCTCA-3'    |
| Pro-V12-2-F | 5'-TAGCCTCGAGCAACTGACTCAGAGAAAAAC-3'      |
| Pro-V12-2-F | 5'-TAGCGAAGCTTTCCTCTCAGGATACTGGTCTCT-3'   |
| Pro-V14F    | 5'-TACATCGCTAGCCATTTATGTGTACCATAATAAT-3'  |
| Pro-V14R    | 5'-TAGCCTCGAGGGCAGATTGAGGGCAGAGGAG-3'     |
| Pro-V16F    | 5'-TAGCCTCGAGTTGCAATCTACCTCTGCTGCTC-3'    |
| Pro-V16R    | 5'-TAGCGAAGCTTTGTGATGACACCACTGTCTCCG-3'   |
| Pro V17-FX  | 5'-TAGCCTCGAGGCAGGTGTGACCTACGATAAC-3'     |
| Pro V17-RH  | 5'-TAGCGAAGCTTGGATGTCCAGAACAGGAAA-3'      |
| Pro-V19-F   | 5'-TATCTCGAGCATTGAGAAAAGACAACAA-3'        |
| Pro-V19-R   | 5'-CGAGAAGCTTAGTTTGGAGGGACTTCTT-3'        |
| Pro-V20F    | 5'-TAGCCTCGAGGATAAGGTAAGTGAAGCGGGA-3'     |
| Pro-V20R    | 5'-TAGCGAAGCTTCTCAGTGTGACTTACACCC-3'      |
| Pro-V22F    | 5'-TAGCCTCGAGGATGAAATATGGTAACAAGG-3'      |
| Pro-V22R    | 5'-TAGCGAAGCTTAGGAGATAAAGGGCTACATA-3'     |
| Pro-V24F    | 5'-TACATCGCTAGCCCAATGATATGTGACAGAGATGA-3' |
| Pro-V24R    | 5'-TAGCCTCGAGGATCACACTAGGCCAGCAGAG-3'     |
| Pro-V25F    | 5'-TAGCCTCGAGCAATTGGGCCATCTTCTGCCAC-3'    |
| Pro-V25R    | 5'-TAGCGAAGCTTCAGGTGGATACTTCAATCC-3'      |
| Pro-V28F    | 5'-TAGCCTCGAGAGTTGTCTTGTGGGCAACTCTG-3'    |
| Pro-V28R    | 5'-TAGCGAGATCTGCTAGATAGCCTCAAGGCTGCAAA-3' |

**Table S5. Recombination substrate oligoes**

| Primer name | Sequences                           |
|-------------|-------------------------------------|
| RS V1 F     | TAGCCTCGAGATACGGAGCTGAGGCTGCAAG     |
| RS V1 R     | TACATCGCGCCGCGAGTACCTTATAACTCATGCA  |
| RS V15F     | TAGCCTCGAGCCTTCTCCACTCTGAAGATTCTC   |
| RS V15R     | TACATCGCGCCGCTTCCACCCAAAGATTCTTAA   |
| RS V16F     | TAGCCTCGAGACTCAACTCTGAAGATCCAGA     |
| RS V16R     | TACATCGCGCCGCTAATGTAATACTCGTTACCAT  |
| RS V18F     | TAGCCTCGAGCCCAACATCCTAAAGTG         |
| RS V18R     | TACATCGCGCCGCTTCTCCGTAAGCATGGTG     |
| RS V20F     | TAGCCTCGAGCAGTATCCCAACTTATCCT       |
| RS V20R     | TACATCGCGCCGCTCCTGGGTACCCTCCCATTTC  |
| RS V23F     | TAGCCTCGAGCACTCTGCAGCCTGGGAATC      |
| RS V23R     | TACATCGCGCCGCTGACTTGGTCTGGGTGTGCTG  |
| RS V24F     | TAGCCTCGAGAGTGCATCCTGAAATCCTAT      |
| RS V24R     | TACATCGCGCCGCGAGACCTGGCCTGTTTCTCATG |
| RS V26F     | TAGCCTCGAGCAAGAAGTTCTCAGCAAATA      |
| RS V26R     | TACATCGCGCCGCGATACAGGTTTCTCAGTTAGTT |

**Table S6. Computational analysis coefficients for determinants of V $\beta$  frequencies (all *Tcrb* V gene segments): Classifier step, three features**

| Features                                                       | Estimate | SE      | <i>t</i> | <i>Pr</i> (>  <i>t</i>  ) |
|----------------------------------------------------------------|----------|---------|----------|---------------------------|
| Intercept                                                      | 1.09059  | 1.52205 | 0.717    | 0.47903                   |
| Recombination signal information content (RIC) score           | 0.08803  | 0.02619 | 3.362    | 0.00207                   |
| Formaldehyde-assisted isolation of regulatory elements (FAIRE) | 0.03185  | 0.01639 | 1.944    | 0.06105                   |
| RNA Pol II                                                     | 0.65913  | 0.26654 | 2.473    | 0.01909                   |

**Table S7. Computational analysis coefficients for determinants of V $\beta$  frequencies (all *Tcrb* V gene segments): Combinatorial analysis of 13 features and their correlation to recombination frequency**

| Number of features | Pearson correlation coefficient | <i>P</i> value |
|--------------------|---------------------------------|----------------|
| 13                 | 0.77954                         | 0.4707         |
| 8                  | 0.74191                         | 0.1015         |
| 7                  | 0.72604                         | 0.07434        |
| 6                  | 0.71277                         | 0.04925        |
| 5                  | 0.68818                         | 0.03779        |
| 4                  | 0.66405                         | 0.0265         |
| 3                  | 0.64982                         | 0.01359        |
| 2                  | 0.60304                         | 0.01089        |
| 1                  | 0.53998                         | 0.00782        |

**Table S8. Coefficients for determinants of V $\beta$  frequencies (rearranging V $\beta$  segments)**

| Features                                                      | Estimate | SE       | <i>t</i> | <i>Pr</i> (>  <i>t</i>  ) |
|---------------------------------------------------------------|----------|----------|----------|---------------------------|
| All <i>Tcrb</i> V gene segments (regressor step, 13 features) |          |          |          |                           |
| Intercept                                                     | 0.08707  | 5.81E+00 | 0.015    | 0.9882                    |
| RIC score                                                     | 0.08817  | 3.72E-02 | 2.373    | 0.0273                    |
| 3C cross-linking                                              | -2.17745 | 3.14E+00 | -0.693   | 0.4961                    |
| Transcription                                                 | -0.1299  | 1.56E-01 | -0.83    | 0.4156                    |
| CCCTC-binding factor (CTCF)                                   | 0.9394   | 1.24E+00 | 0.756    | 0.4579                    |
| FAIRE                                                         | 0.01538  | 2.46E-02 | 0.625    | 0.5384                    |
| H3ac                                                          | -0.31847 | 5.05E-01 | -0.63    | 0.5353                    |
| H3K27ac                                                       | 0.03124  | 3.86E-02 | 0.81     | 0.4271                    |
| H3K4me1                                                       | 0.16488  | 6.88E-01 | 0.24     | 0.813                     |
| H3K4me2                                                       | 0.0194   | 1.67E-02 | 1.159    | 0.2595                    |
| H3K4me3                                                       | -0.08483 | 3.68E-01 | -0.231   | 0.8197                    |
| H3K9me2                                                       | 0.74873  | 1.27E+00 | 0.59     | 0.5618                    |
| P300                                                          | -0.03168 | 3.03E-02 | -1.047   | 0.3069                    |
| RNA Pol II                                                    | 1.10351  | 5.21E-01 | 2.119    | 0.0462                    |
| All <i>Tcrb</i> V gene segments (Regressor step, 5 features)  |          |          |          |                           |
| Intercept                                                     | 0.62866  | 0.35047  | 1.794    | 0.0907                    |
| Transcription                                                 | -0.0613  | 0.0467   | -1.313   | 0.2066                    |
| CTCF                                                          | 0.31418  | 0.25634  | 1.226    | 0.2371                    |
| H3K4me2                                                       | 0.00779  | 0.00365  | 2.137    | 0.0475                    |
| H3K4me3                                                       | 0.16139  | 0.0666   | 2.423    | 0.0268                    |
| P300                                                          | -0.0066  | 0.00646  | -1.027   | 0.319                     |

## Other Supporting Information Files

[Dataset S1 \(XLSX\)](#)
